# Supplementary material for: Thermal effect on the efficiency and stability of luminescent solar concentrators based on colloidal quantum dots
Source: Royal Society of Chemistry journal article supplement (doi:10.1039/d0tc05466f), 2021-01-01
Supplement: d0tc05466f1.pdf [file d0tc05466f1.pdf]

## Supporting information

### Thermal Effect on the Efficiency and Stability of Luminescent Solar Concentrators based on Colloidal Quantum Dots

Bingxu Liu<sup>a</sup>, Shihuan Ren<sup>a</sup>, Guangting Han<sup>b</sup>, Haiguang Zhao<sup>b,\*</sup>, Xingyi Huang<sup>e</sup>, Bin Sun<sup>c,d\*</sup>, Yuanming Zhang<sup>b,\*</sup>

<sup>a</sup> College of Textile and Clothing, Qingdao University, No. 308 Ningxia Road, Qingdao, 266071, P. R. China

<sup>b</sup> College of Physics & The State Key Laboratory of Bio-Fibers and Eco-Textiles, Qingdao University, No. 308 Ningxia Road, Qingdao, 266071, P. R. China

<sup>c</sup> College of Microtechnology & Nanotechnology, Qingdao University, No. 308 Ningxia Road, Qingdao, 266071, P. R. China

<sup>d</sup> Weihai Innovation Research Institute of Qingdao University, Weihai 264200, P. R. China

<sup>e</sup> Department of Polymer Science and Engineering, Shanghai Key Laboratory of Electrical Insulation and Thermal Aging, Shanghai Jiao Tong University, Shanghai 200240, PR China.

\* Corresponding authors. Email addresses: [hgzhao@qdu.edu.cn](mailto:hgzhao@qdu.edu.cn), [qdusun@qdu.edu.cn](mailto:qdusun@qdu.edu.cn), [zhangyuanming001@163.com](mailto:zhangyuanming001@163.com)

## Supporting tables and figures

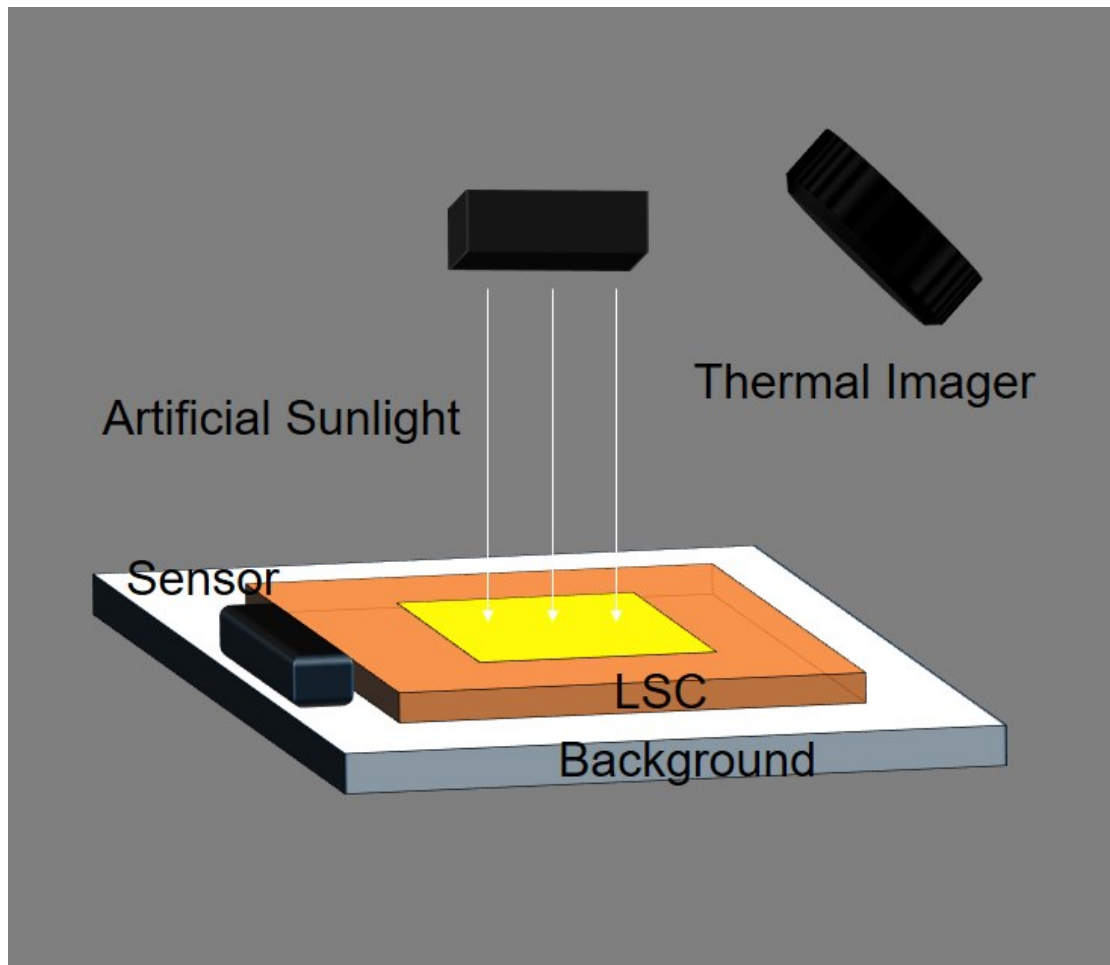

**Figure S1.** The setting-up scheme for the thermal imaging measurement.

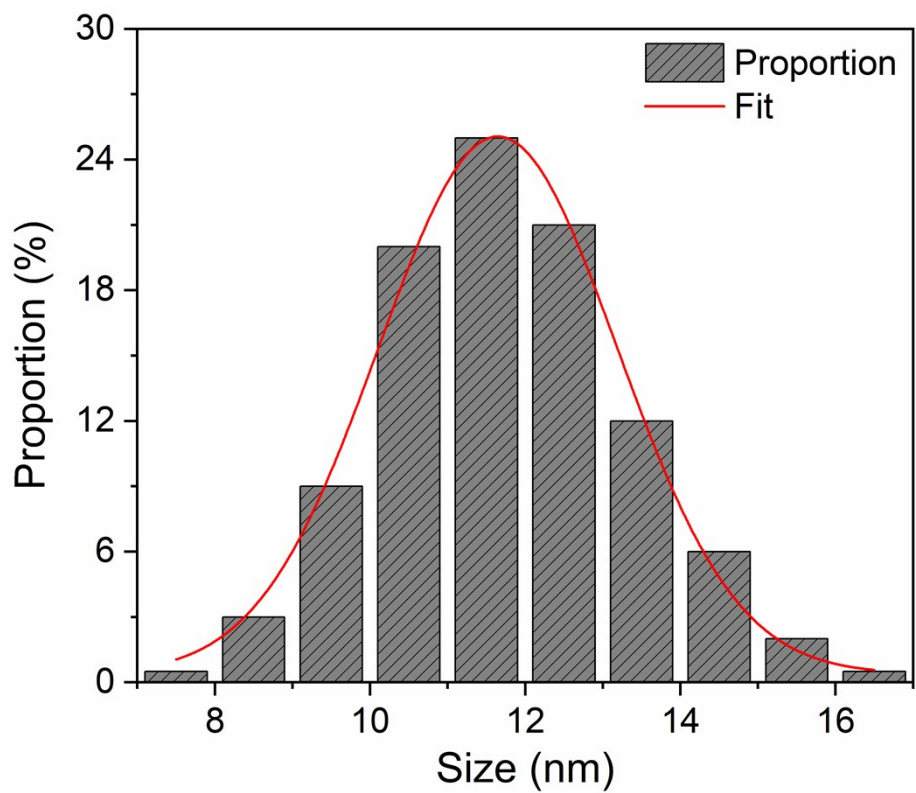

**Figure S2.** The size distribution of CdSe/CdS.

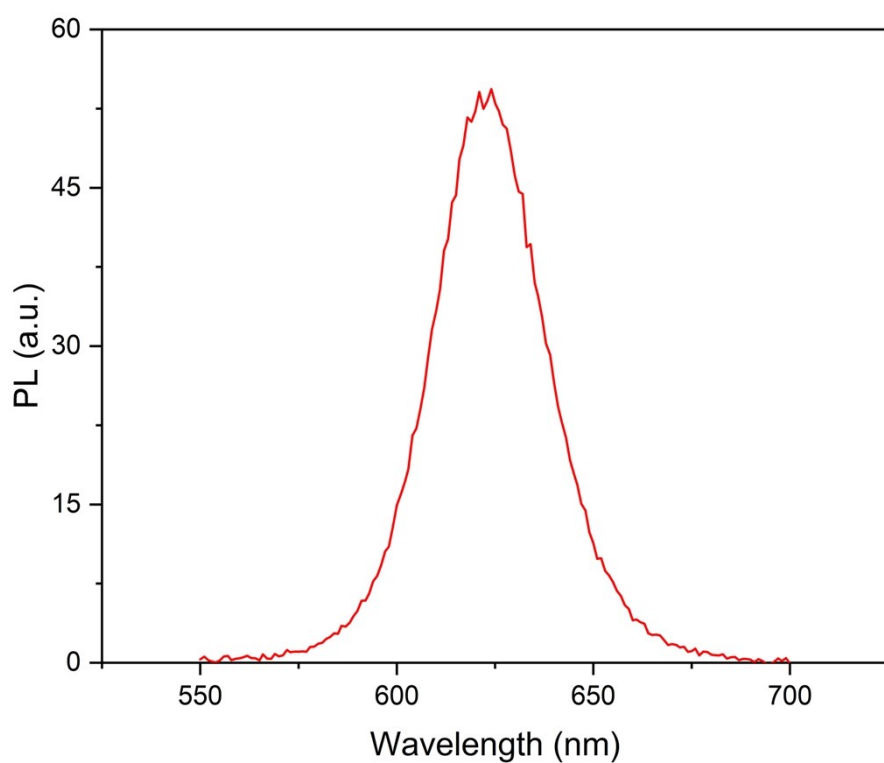

**Figure S3.** PL spectra recorded from the LSC based on CdSe/CdS QDs/PLMA polymer.

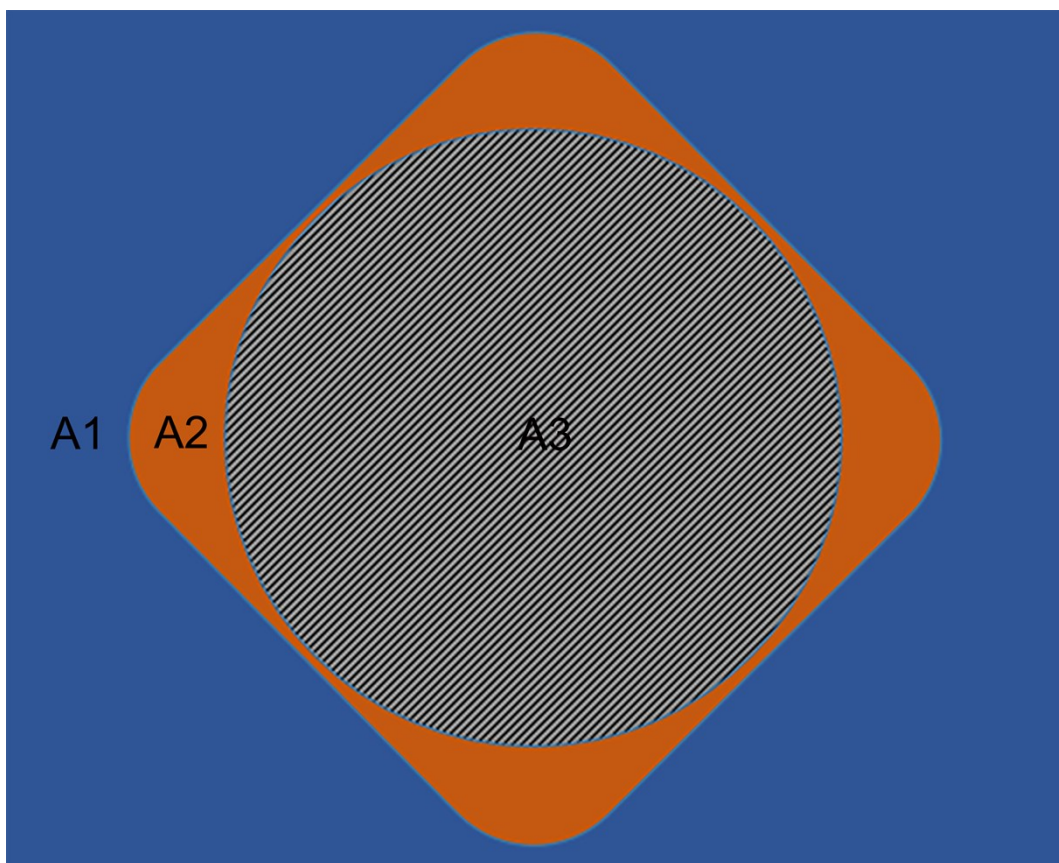

**Figure S4.** A3 is the selected area of the LSC for the temperature monitoring. A1 and A2 are the LSC exposed without and with sunlight ( $100 \text{ mW/cm}^2$ ), respectively.

**Table S1.** The dimension and mass of the LSCs.

| Type           | Mass (g) | Long (cm) | Width (cm) | Thin (mm) |
|----------------|----------|-----------|------------|-----------|
| QDs/PLMA       | 13.43    | 6.5       | 7          | 3         |
| QDs/PLMA-PMMA  | 73.7     | 10        | 10         | 7         |
| QDs/PMMA-Glass | 122.24   | 10        | 10         | 5         |

**Table S2.** Measured Refractive Index and calculated Total internal reflection efficiency and Reflectance.

| <b>Ambient Temperature</b> | <b>Refractive index</b> | <b>Total internal reflection efficiency</b> | <b>Reflectance</b> |
|----------------------------|-------------------------|---------------------------------------------|--------------------|
| <b>Glass</b>               | 1.50                    | 0.745                                       | 4%                 |
| <b>PLMA</b>                | 1.49                    | 0.741                                       | 3.9%               |
| <b>PMMA</b>                | 1.49                    | 0.741                                       | 3.9%               |

Total internal reflection efficiency,  $P_{TIR}$  is defined by the escape cone identified by the critical angle  $\theta$  of the air/glass interface:<sup>1</sup>

$$P_{TIR} = \sqrt{1 - \left(\frac{n_{air}}{n}\right)^2}$$

$R$  can be calculated as follows:<sup>1</sup>

$$R = \frac{(n - n_{air})^2}{(n_{air} + n)^2}$$

**Table S3.** The saturation temperature of LSCs during the thermal measurement.

| <b>Ambient Temperature</b> | <b>QDs/PLMA (°C)</b> | <b>QDs/PLMA-PMMA (°C)</b> | <b>QDs/PMMA-Glass (°C)</b> |
|----------------------------|----------------------|---------------------------|----------------------------|
| <b>10 °C</b>               | 25.6                 | 22                        | 15.5                       |
| <b>20 °C</b>               | 32.25                | 28.64                     | 26.08                      |
| <b>30 °C</b>               | 40.35                | 39.42                     | 33.94                      |
| <b>40 °C</b>               | 49.16                | 46.87                     | 41.88                      |

**Table S4.** The saturation time of LSCs during the thermal measurement.

| <b>Ambient Temperature</b> | <b>QDs/PLMA (s)</b> | <b>QDs/PLMA-PMMA (s)</b> | <b>QDs/PMMA-Glass (s)</b> |
|----------------------------|---------------------|--------------------------|---------------------------|
| <b>10 °C</b>               | 337                 | 410                      | 226                       |
| <b>20 °C</b>               | 272                 | 367                      | 308                       |
| <b>30 °C</b>               | 313                 | 487                      | 312                       |

|       |     |     |     |
|-------|-----|-----|-----|
| 40 °C | 254 | 387 | 201 |
|-------|-----|-----|-----|

**Table S5.** The temperature variation rate of LSCs.

| Ambient Temperature | QDs/PLMA (°C/min) | QDs/PLMA-PMMA (°C/min) | QDs/PMMA-Glass (°C/min) |
|---------------------|-------------------|------------------------|-------------------------|
| 10 °C               | 2.46              | 1.49                   | 0.98                    |
| 20 °C               | 2.34              | 1.26                   | 1                       |
| 30 °C               | 2.29              | 1.28                   | 0.99                    |
| 40 °C               | 2.34              | 1.45                   | 1.09                    |

**Table S6.** The temperature variation of the measured LSCs before and after temperature saturation.

| Ambient Temperature | QDs/PLMA (°C) | QDs/PLMA-PMMA (°C) | QDs/PMMA-Glass (°C) |
|---------------------|---------------|--------------------|---------------------|
| 10 °C               | 13.8          | 10.2               | 3.7                 |
| 20 °C               | 10.59         | 7.71               | 5.15                |
| 30 °C               | 11.93         | 10.39              | 5.16                |
| 40 °C               | 9.9           | 8.64               | 3.65                |

**Table S7.** The current output per unit area (mA/cm<sup>2</sup>) of the solar cells. The arrow bar for all the measured is less than ±0.01 mA/cm<sup>2</sup>

| Cycles | QDs/PMMA-Glass | QDs/PMMA-PLMA | QDs/PLMA |
|--------|----------------|---------------|----------|
| 1      | 1.697          | 2.176         | 3.715    |
| 2      | 1.694          | 2.189         | 3.729    |
| 3      | 1.701          | 2.182         | 3.751    |
| 4      | 1.722          | 2.189         | 3.753    |
| 5      | 1.716          | 2.199         | 3.783    |
| 6      | 1.723          | 2.205         | 3.774    |
| 7      | 1.730          | 2.214         | 3.792    |

Reference:

[1] V. I. Klimov, T. A. Baker, J. Lim, K. A. Velizhanin, H. McDaniel, *ACS Photonics*, 2016, 3, 1138-1148.
